# Supplementary material for: Immunosuppression and COVID-19 infection in British Columbia: Protocol for a linkage study of population-based administrative and self-reported survey data
Source: PLOS journal article supplement (doi:10.1371/journal.pone.0259601), 2021-11-19

## BC COVID-19 Survey Timeline

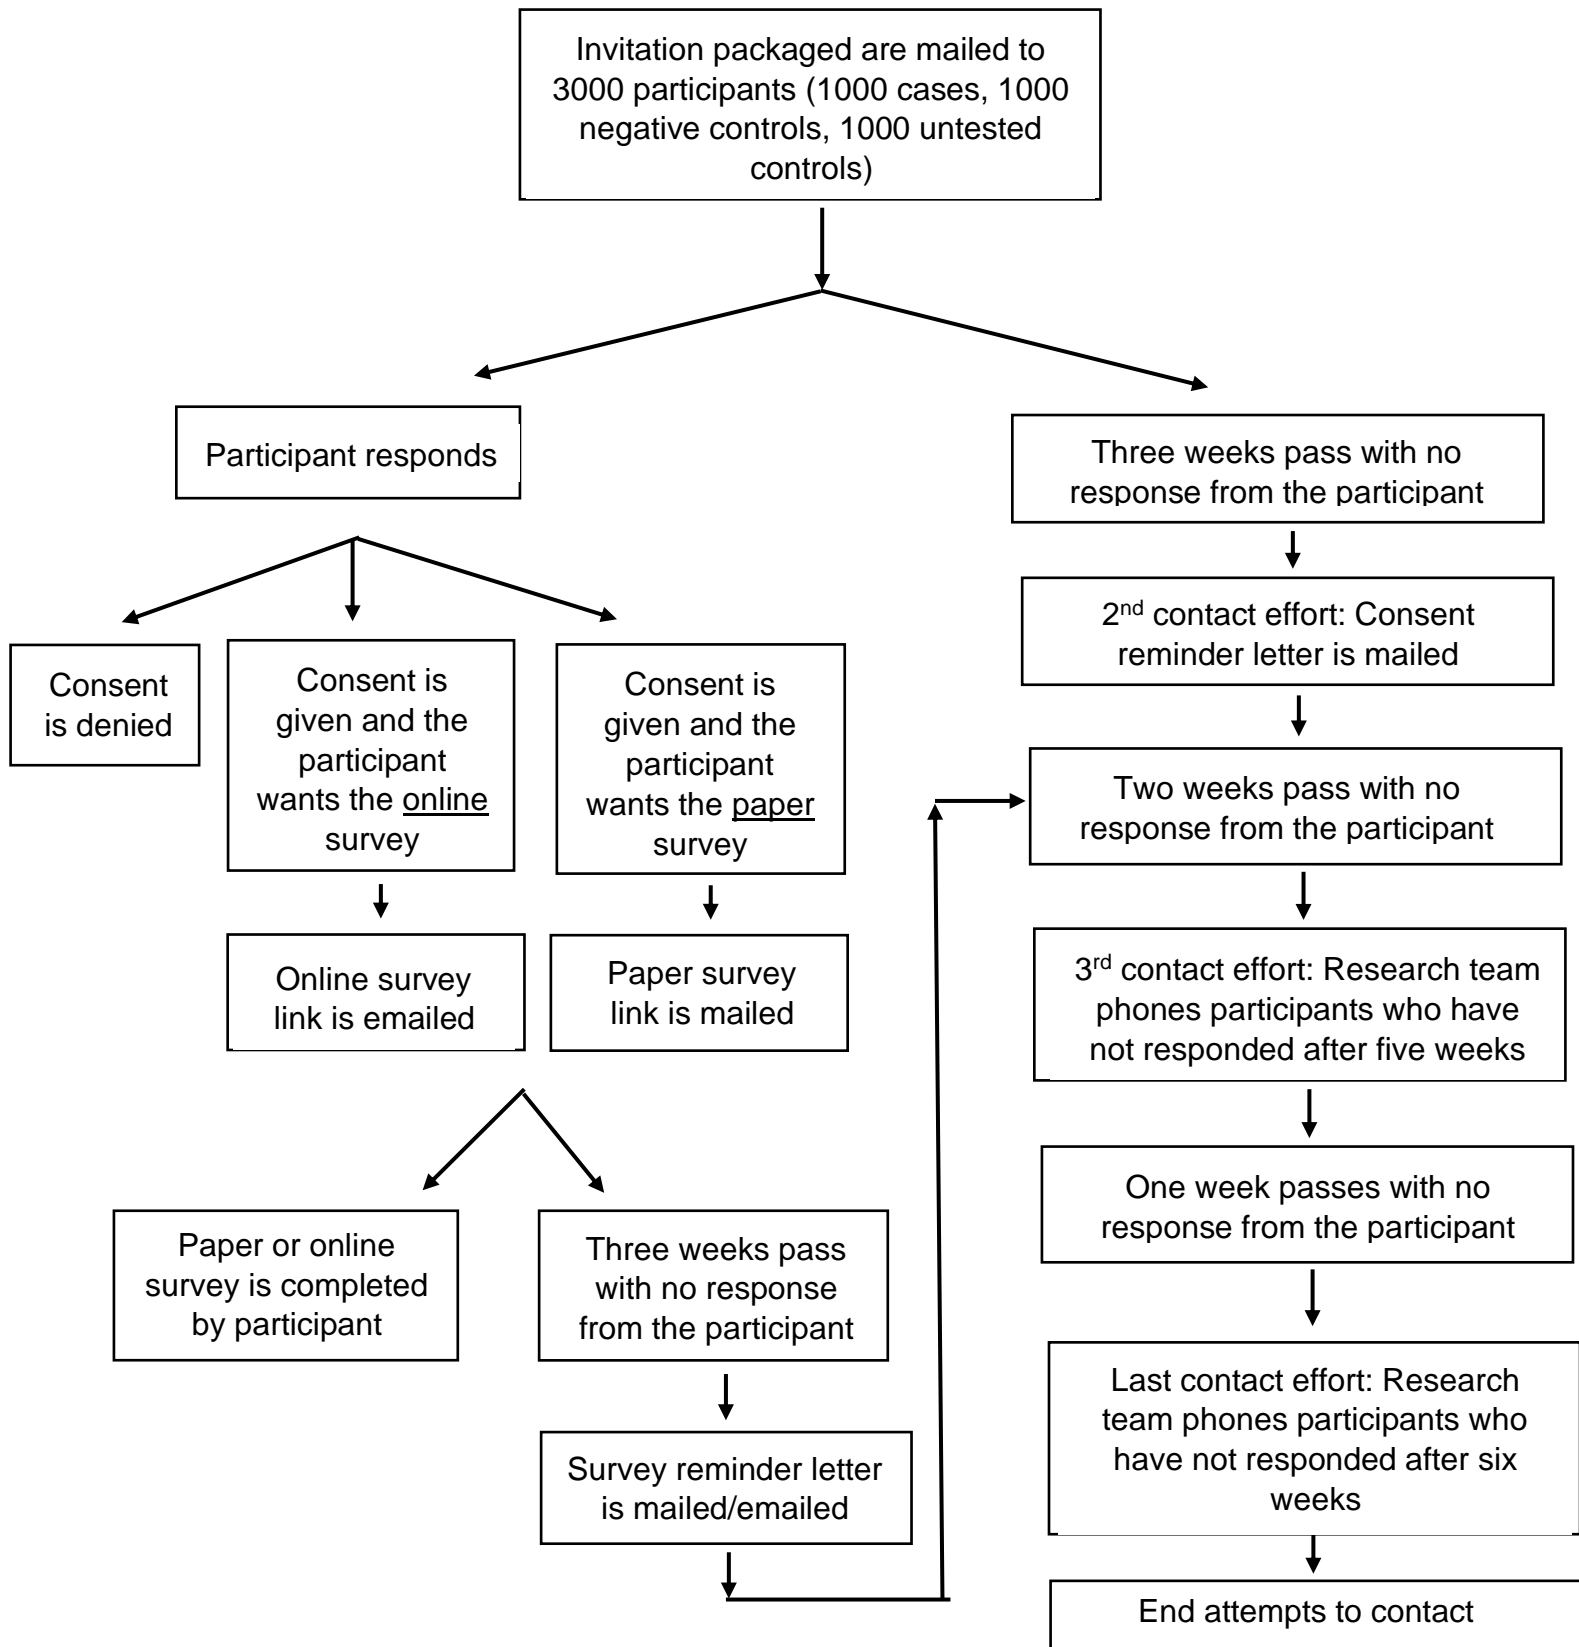

Supplement: S2 (10.1371/journal.pone.0259601.s002) [file journal.pone.0259601.s002]
